# Supplementary material for: The Role of Geriatric Nutritional Risk Index in Predicting Postoperative Pulmonary Complications in Elderly Lung Cancer Patients Undergoing Surgical Resection
Source: Research Square preprint supplement (doi:10.21203/rs.3.rs-1155133/v1), 2021-12-14
Supplement: Supplementary file 1 [file b94debc061d4c4da958a6da9.docx]

Table 1. Patient characteristics

| Variable | Number (percent) |
| --- | --- |
| Total | 128 |
| Age, mean | 65.77 |
| Sex |  |
| Male | 94 (73.43%) |
| Female | 34 (26.57%) |
| Surgery method |  |
| Thoracotomy | 120 (93.75%) |
| VATS | 8 (6.25%) |
| Smoking history |  |
| Never | 58 (45.31%) |
| Current | 52 (40.63%) |
| Ever | 18 (14.06%) |
| Pathology |  |
| Squamous | 45 (35.16%) |
| Adenocarcinoma | 70 (54.69%) |
| Large cell lung cancer | 6 (4.69%) |
| Small cell lung cancer | 2 (1.56%) |
| Other | 5 (3.90%) |
| GNRI, mean | 106.91 |
| BMI, mean | 23.92 |

VATS: video-assisted thoracoscope; GNRI: geriatric nutritional risk index; BMI: body mass index.

Table 2. Postoperative pulmonary complications in the study population

| Item |  |
| --- | --- |
| Total events | 37 |
| Pneumonia | 10 |
| Atelectasis | 2 |
| Mechanical ventilation >48 h | 3 |
| Re-intubation | 1 |
| Persistent air leakage or pleural effusion | 19 |
| Pneumorrhagia | 1 |
| Pulmonary embolism | 1 |
| Total patients | 29 |
| 1 event | 23 |
| >1 event | 6 |

Table 3. Correlation between postoperative pulmonary complications and immunonutritional parameters

| Variable | Non-PPC | PPC | P value |
| --- | --- | --- | --- |
| Sex |  |  |  |
| Male | 67 | 27 | 0.007 |
| Female | 32 | 2 |  |
| Age, years | 65.98±4.95 | 65.07±3.36 | 0.354 |
| Surgery method |  |  | 0.682 |
| VATS | 7 | 1 |  |
| Thoracotomy | 92 | 28 |  |
| Smoking history |  |  | 0.609 |
| Never | 47 | 11 |  |
| Current | 38 | 14 |  |
| Ever | 14 | 4 |  |
| Pathology |  |  | 0.052 |
| Squamous | 28 | 17 |  |
| Adenocarcinoma | 60 | 10 |  |
| Small cell lung cancer | 2 | 0 |  |
| Large cell lung cancer | 5 | 1 |  |
| Other | 4 | 1 |  |
| GNRI | 107.85±9.37 | 103.69±9.38 | 0.038 |
| BMI | 24.21±3.33 | 22.94±2.75 | 0.065 |
| FEV1% | 85.37±16.71 | 74.83±18.13 | 0.004 |
| FVC% | 86.94±15.44 | 81.09±14.23 | 0.070 |
| LY | 1.87±0.57 | 1.75±0.54 | 0.287 |
| LY% | 30.71±7.98 | 24.73±9.10 | 0.001 |
| RBC | 4.37±0.50 | 4.33±0.52 | 0.700 |
| HB | 132.80±14.22 | 134.52±14.79 | 0.571 |
| ALB | 42.06±3.75 | 41.03±4.39 | 0.213 |
| PALB | 0.22±0.06 | 0.21±0.06 | 0.407 |
| Globin | 26.68±4.20 | 25.69±3.32 | 0.246 |
| Urea | 5.54±1.41 | 5.83±1.90 | 0.366 |
| Creatinine | 62.72±10.92 | 65.45±15.92 | 0.291 |
| Uric acid | 321.60±70.54 | 309.93±84.38 | 0.456 |
| Number of segments removed | 4.13±1.69 | 4.24±1.55 | 0.754 |

Data represent mean ± standard deviation. Abbreviations: PPC, post pulmonary complication; VATS: video-assisted thoracoscope; GNRI, geriatric nutritional risk index; BMI: body mass index; FEV1: forced expiratory volume; FVC: forced vital capacity; LY: lymphocyte; RBC: red blood cell; HB: hemoglobin; ALB: albumin; PALB: Prealbumin.

Table 4. Receiver operating characteristic curve analysis of immunonutritional parameters

| Parameter | AUC | P value | Cutoff value | Sensitivity | Specificity | Youden index |
| --- | --- | --- | --- | --- | --- | --- |
| GNRI | 0.639 | 0.023 | 105.736 | 0.646 | 0.655 | 1.301 |
| BMI | 0.599 | 0.104 |  |  |  |  |
| FEV1 | 0.664 | 0.007 | 77.150 | 0.657 | 0.655 | 1.312 |
| FVC | 0.603 | 0.093 | 89.05 | 0.424 | 0.793 | 1.217 |
| LY% | 0.686 | 0.002 | 27.300 | 0.657 | 0.655 | 1.312 |

Abbreviations: GNRI, geriatric nutritional risk index; BMI: body mass index; FEV1: forced expiratory volume; FVC: forced vital capacity; LY: lymphocyte; AUC: area under the curve.

Table 5: Multivariate analysis of the influence parameters of PPCs

| Parameters | OR | 95% CI | P value |
| --- | --- | --- | --- |
| GNRI: High Vs Low | 0.377 | 0.145, 0.975 | 0.044 |
| Sex：female vs male | 0.221 | 0.016, 1.066 | 0.060 |
| LY%: High Vs Low | 0.390 | 0.152, 1.002 | 0.051 |
| FEV1%: High Vs Low | 0.296 | 0.116, 0.759 | 0.011 |

Abbreviations: GNRI, geriatric nutritional risk index; BMI: body mass index; FEV1: forced expiratory volume; LY: lymphocyte; OR: odd ration; CI: confidence interval.
